# Supplementary material for: Creating superhydrophobic surfaces with flowery structures on nickel substrates through a wet-chemical-process
Source: Royal Society of Chemistry journal article supplement (doi:10.1039/b709665h), 2007-01-01
Supplement: b709665h.pdf [file b709665h.pdf]

## Supporting Information

### Creating superhydrophobic surfaces with flowery structures on nickel substrates through wet-chemical-process

Mei Li, Jianhai Xu and Qinghua Lu \*

School of Chemistry and Chemical Technology, Shanghai Jiao Tong University,  
Shanghai, 200240, P. R. China

\* Corresponding author. Tel.: +86-21-34203723, Fax: +86-21-54747535.

E-mail address: [qhlu@sjtu.edu.cn](mailto:qhlu@sjtu.edu.cn)

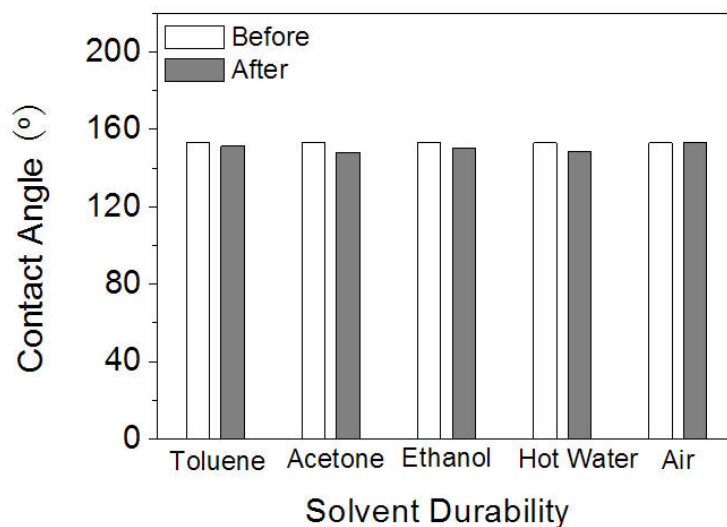

Fig. S1. Water contact angle of the as-prepared superhydrophobic nickel surfaces before and after immersed in organic solvents, hot water (60°C) or conserved in air for 4 days.

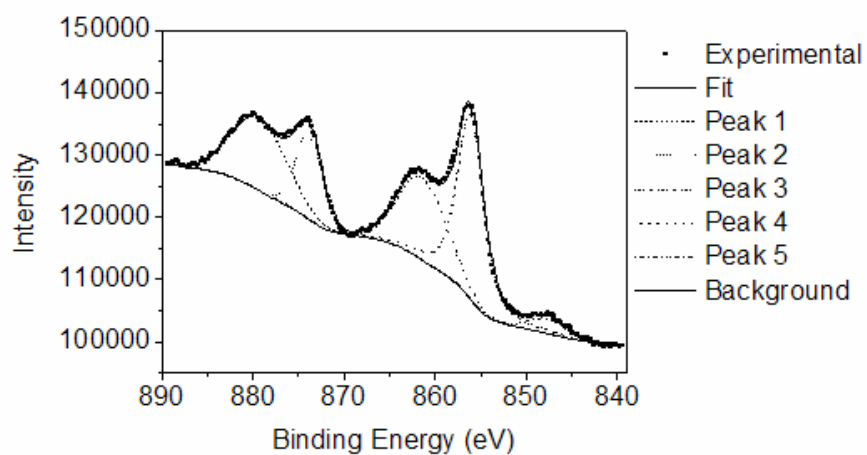

Fig.S2. XPS spectra for Ni on DPA-steeped surface

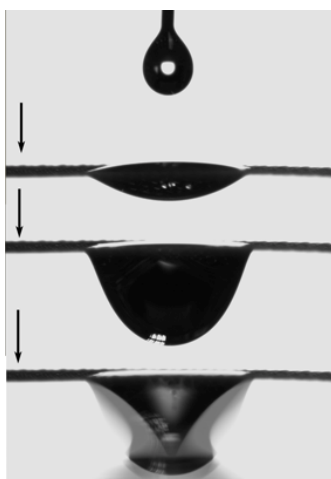

Fig.S3. Diesel oil can spread over the modified steel mesh and permeate through it freely when added onto the mesh dropwise.
